# Supplementary material for: A New Family of Intrinsically Disordered Proteins: Structural Characterization of the Major Phasin PhaF from Pseudomonas putida KT2440
Source: PubMed Central journal article supplement (PMC3574117; doi:10.1371/journal.pone.0056904), 2013-02-15

## Supporting Figure S1

**A**

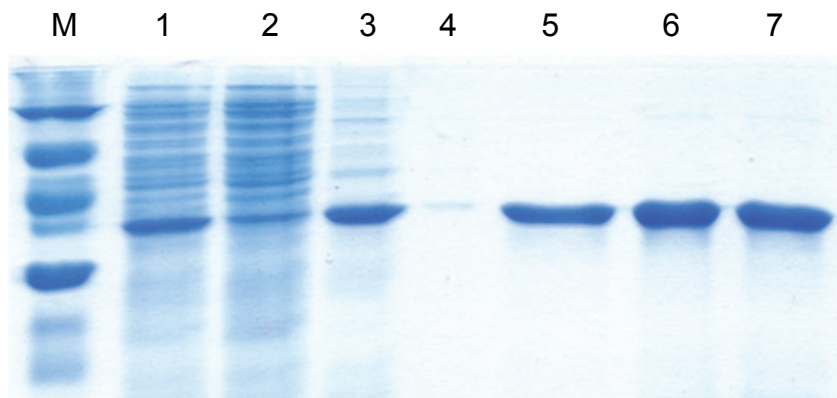

**B**

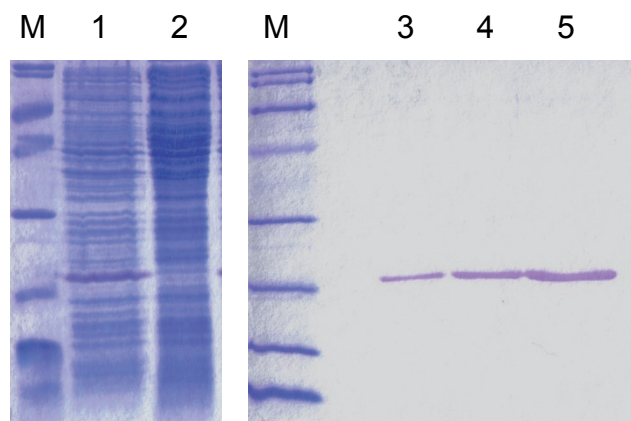

Supplement: pone.0056904.s001.pdf [file pone.0056904.s001.pdf]
