# Supplementary material for: A New Family of Intrinsically Disordered Proteins: Structural Characterization of the Major Phasin PhaF from Pseudomonas putida KT2440
Source: PubMed Central journal article supplement (PMC3574117; doi:10.1371/journal.pone.0056904), 2013-02-15

Supporting Figure 4

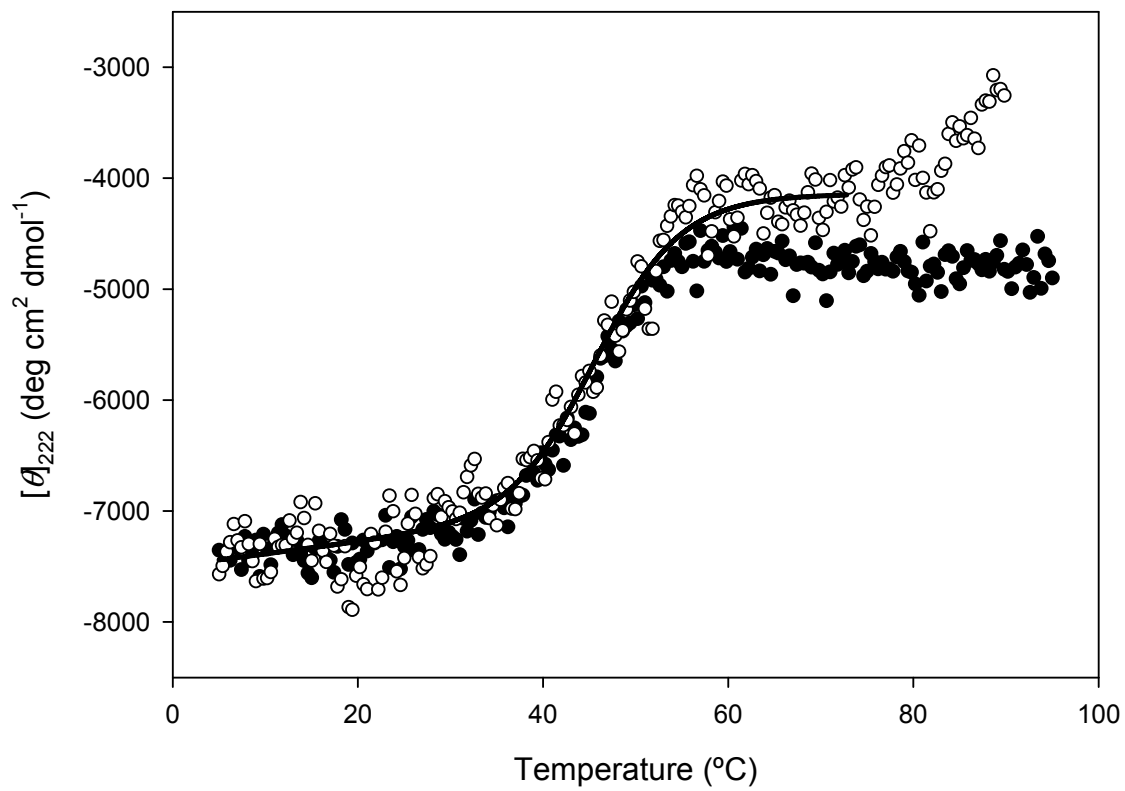

Supplement: pone.0056904.s004.pdf [file pone.0056904.s004.pdf]
